# Supplementary material
Source: MDPI journal article supplement (https://www.mdpi.com/search?q=molecules-26-00170)
Supplement: s001 [file molecules-26-00170-s001.pdf]

Supplementary Material

# Antibacterial activity of fluorobenzoylthiosemicarbazides and their cyclic analogues with 1,2,4-triazole scaffold

Urszula Kosikowska <sup>1</sup>, Monika Wujec <sup>2</sup>, Nazar Trotsko <sup>2</sup>, Wojciech Płonka <sup>3</sup>, Piotr Paneth <sup>4</sup> and Agata Paneth <sup>2,\*</sup>

<sup>1</sup> Department of Pharmaceutical Microbiology, Faculty of Pharmacy, Medical University of Lublin, Chodźki 1, 20-093 Lublin, Poland; [urszula.kosikowska@umlub.pl](mailto:urszula.kosikowska@umlub.pl)

<sup>2</sup> Department of Organic Chemistry, Faculty of Pharmacy, Medical University of Lublin, Chodźki 4a, 20-093 Lublin, Poland; [monika.wujec@umlub.pl](mailto:monika.wujec@umlub.pl), [nazar.trotsko@umlub.pl](mailto:nazar.trotsko@umlub.pl), [agata.paneth@umlub.pl](mailto:agata.paneth@umlub.pl)

<sup>3</sup> FQS-Fujitsu Poland, Parkowa 11, 33-332 Kraków, Poland; [w.plonka@fqs.pl](mailto:w.plonka@fqs.pl)

<sup>4</sup> Institute of Applied Radiation Chemistry, Faculty of Chemistry, Lodz University of Technology, Żeromskiego 116, 90-924 Lodz, Poland; [piotr.paneth@p.lodz.pl](mailto:piotr.paneth@p.lodz.pl)

\*correspondence: [agata.paneth@umlub.pl](mailto:agata.paneth@umlub.pl) (A.P.)

## Table of contents:

1. **Table S1.** Steric and electronic parameters for F, Cl, Br, I, and CF<sub>3</sub> substituents
2. Physicochemical characterisation of the thiosemicarbazides
3. Physicochemical characterization of the 1,2,4-triazole-3-thiones
4. List of descriptors used in QSAR modeling
5. Docking binding poses

**Table S1.** Steric and electronic parameters for F, Cl, Br, I, and CF<sub>3</sub> substituents

|                 | $\sigma_m$ | $\sigma_I$ | MR    | Es    | $\sigma_v$ | $\pi$ |
|-----------------|------------|------------|-------|-------|------------|-------|
| F               | 0.34       | 0.52       | 5.02  | -2.40 | 0.27       | 0.14  |
| Cl              | 0.37       | 0.47       | 0.92  | -0.46 | 0.55       | 0.71  |
| Br              | 0.39       | 0.50       | 6.03  | -0.97 | 0.65       | 0.86  |
| I               | 0.35       | 0.39       | 8.88  | -1.16 | 0.78       | 1.12  |
| CF <sub>3</sub> | 0.43       | 0.42       | 13.94 | -1.40 | 0.91       | 0.88  |

Note:  $\sigma_m$  – Hammett substituent constant;  $\sigma_I$  – inductive substituent constant; MR – molar refractivity parameter, Es – Taft size parameter;  $\sigma_v$  – Charton's steric parameter,  $\pi$  – Hansch substituent constant

### Physicochemical characterisation of the thiosemicarbazides

1-(2-fluorobenzoyl)-4-propylthiosemicarbazide (**1a**). CAS number: 901345-11-7. Yield: 45%. M.p. 140-142°C. <sup>1</sup>H-NMR (DMSO-d<sub>6</sub>)  $\delta$  (ppm): 0.90 (t, 3H, CH<sub>3</sub>,  $J$  = 9.0 Hz); 1.58 (sext, 2H, CH<sub>2</sub>,  $J$  = 9.0 Hz); 3.39 (q, 2H, CH<sub>2</sub>,  $J$  = 9.0 Hz); 7.32-7.41 (m, 2H, ArH); 7.60-7.69 (m, 1H, ArH); 7.86 (dt, 1H, ArH,  $J_1$  = 1.8 Hz,  $J_2$  = 6.0 Hz); 8.00 (s, 1H, NH); 9.43 (s, 1H, NH); 10.18 (s, 1H, NH). Anal. calcd. for C<sub>11</sub>H<sub>14</sub>FN<sub>3</sub>OS: C, 51.75; H, 5.53; N, 16.46. Found: C, 51.88; H, 5.49; N, 16.76.

4-butyl-1-(2-fluorobenzoyl)thiosemicarbazide (**2a**). CAS number: 443634-89-7. Yield: 40%. M.p. 145-147°C. <sup>1</sup>H-NMR (DMSO-d<sub>6</sub>)  $\delta$  (ppm): 0.95 (quint, 3H, CH<sub>3</sub>,  $J$  = 9 Hz); 1.33 (sext, 2H, CH<sub>2</sub>,  $J$  = 9 Hz); 1.55 (quint, 2H, CH<sub>2</sub>,  $J$  = 9 Hz); 3.49 (q, 2H, CH<sub>2</sub>,  $J$  = 9 Hz); 7.34-7.89 (m, 4H, ArH); 7.97 (s, 1H, NH); 9.42 (s, 1H, NH); 10.17 (s, 1H, NH). Anal. calcd. for C<sub>12</sub>H<sub>16</sub>FN<sub>3</sub>OS: C, 53.51; H, 5.99; N, 15.60. Found: C, 53.55; H, 5.78; N, 15.62.

1-(2-fluorobenzoyl)-4-(1-naphthyl)thiosemicarbazide (**4a**). CAS number: 891549-13-6. Yield: 64%. M.p. 154-156°C. <sup>1</sup>H-NMR (DMSO-d<sub>6</sub>)  $\delta$  (ppm): 7.35-8.03 (m, 11H, ArH); 9.95 (s, 1H, NH); 10.03 (s, 1H, NH); 10.54 (s, 1H, NH). Anal. calcd. for C<sub>18</sub>H<sub>14</sub>FN<sub>3</sub>OS: C, 63.70; H, 4.16; N, 12.38. Found: C, 63.75; H, 4.22; N, 12.21.

1-(2-fluorobenzoyl)-4-(3-tolyl)thiosemicarbazide (**5a**). CAS number: 443296-15-9. Yield: 82%. M.p. 168-170°C. <sup>1</sup>H-NMR (DMSO-d<sub>6</sub>)  $\delta$  (ppm): 2.57 (s, 3H, CH<sub>3</sub>); 7.03-7.94 (m, 8H, ArH); 9.77 (s, 1H, NH); 9.85 (s, 1H, NH); 10.38 (s, 1H, NH). Anal. calcd. for C<sub>15</sub>H<sub>14</sub>FN<sub>3</sub>OS: C, 59.39; H, 4.65; N, 13.85. Found: C, 59.57; H, 4.60; N, 13.76.

1-(2-fluorobenzoyl)-4-(3-fluorophenyl)thiosemicarbazide (**7a**). CAS number: 894237-30-0. Yield: 67%. M.p. 172-174°C. <sup>1</sup>H-NMR (DMSO-d<sub>6</sub>)  $\delta$  (ppm): 7.17-7.92 (m, 8H, ArH); 9.85 (s, 1H, NH); 10.01 (s, 1H, NH); 10.40 (s, 1H, NH). Anal. calcd. for C<sub>14</sub>H<sub>11</sub>F<sub>2</sub>N<sub>3</sub>OS: C, 54.71; H, 3.61; N, 13.67. Found: C, 54.59; H, 3.68; N, 13.77.

4-(3-bromophenyl)-1-(2-fluorobenzoyl)thiosemicarbazide (**11a**). Yield: 79%. M.p. 166-168°C. <sup>1</sup>H-NMR (DMSO-d<sub>6</sub>)  $\delta$  (ppm): 7.26-7.86 (m, 8H, ArH); 9.81 (s, 1H, NH); 9.98 (s, 1H, NH); 10.33 (s, 1H, NH). Anal. calcd. for C<sub>14</sub>H<sub>11</sub>BrFN<sub>3</sub>OS: C, 45.66; H, 3.01; N, 11.41. Found: C, 45.88; H, 3.09; N, 11.26.

1-(2-fluorobenzoyl)-4-(3-iodophenyl)thiosemicarbazide (**13a**). Yield: 83%. M.p. 176-178°C. <sup>1</sup>H-NMR (DMSO-d<sub>6</sub>) δ (ppm): 7.17-7.92 (m, 8H, ArH); 9.84 (s, 1H, NH); 10.02 (s, 1H, NH); 10.42 (s, 1H, NH). Anal. calcd. for C<sub>14</sub>H<sub>11</sub>FIN<sub>3</sub>OS: C, 40.49; H, 2.67; N, 10.12. Found: C, 40.20; H, 3.01; N, 10.29.

1-(2-fluorobenzoyl)-4-(4-iodophenyl)thiosemicarbazide (**14a**). Yield: 89%. M.p. 178-180°C. <sup>1</sup>H-NMR (DMSO-d<sub>6</sub>) δ (ppm): 7.21-7.91 (m, 8H, ArH); 9.84 (s, 1H, NH); 9.98 (s, 1H, NH); 10.39 (s, 1H, NH). Anal. C<sub>14</sub>H<sub>11</sub>FIN<sub>3</sub>OS (C, H, N). Anal. calcd. for C<sub>14</sub>H<sub>11</sub>FIN<sub>3</sub>OS: C, 40.49; H, 2.67; N, 10.12. Found: C, 40.51; H, 2.56; N, 10.20.

1-(2-fluorobenzoyl)-4-(4-trifluoromethylphenyl)thiosemicarbazide (**16a**). Yield: 88%. M.p. 198-200°C. <sup>1</sup>H-NMR (DMSO-d<sub>6</sub>) δ (ppm): 7.37-7.90 (m, 8H, ArH); 10.15 (m, 2H, NH); 10.47 (s, 1H, NH). Anal. Anal. calcd. for C<sub>15</sub>H<sub>11</sub>F<sub>4</sub>N<sub>3</sub>OS: C, 50.42; H, 3.10; N, 11.76. Found: C, 50.53; H, 3.33; N, 11.54.

1-(3-fluorobenzoyl)-4-propylthiosemicarbazide (**1b**). CAS number: 891047-47-5. Yield: 64%. M.p. 185-187°C. <sup>1</sup>H-NMR (DMSO-d<sub>6</sub>) δ (ppm): 0.88 (t, 3H, CH<sub>3</sub>, *J* = 9 Hz); 1.55-1.58 (m, 2H, CH<sub>2</sub>); 3.38-3.47 (m, 2H, CH<sub>2</sub>); 7.49-7.83 (m, 4H, ArH); 8.20 (s, 1H, NH); 9.33 (s, 1H, NH); 10.46 (s, 1H, NH). Anal. C<sub>18</sub>H<sub>14</sub>FN<sub>3</sub>OS (C, H, N). Anal. calcd. for C<sub>11</sub>H<sub>14</sub>FN<sub>3</sub>OS: C, 51.75; H, 5.53; N, 16.46. Found: C, 51.80; H, 5.57; N, 16.77.

1-(3-fluorobenzoyl)-4-(1-naphthyl)thiosemicarbazide (**4b**). CAS number: 891548-57-5. Yield: 90%. M.p. 170-172°C. <sup>1</sup>H-NMR (DMSO-d<sub>6</sub>) δ (ppm): 7.55-8.02 (m, 11H, ArH); 9.90 (s, 1H, NH); 10.12 (s, 1H, NH); 10.18 (s, 1H, NH); 10.86 (s, 1H, NH). Anal. C<sub>18</sub>H<sub>14</sub>FN<sub>3</sub>OS (C, H, N). Anal. calcd. for C<sub>18</sub>H<sub>14</sub>FN<sub>3</sub>OS: C, 63.70; H, 4.16; N, 12.38. Found: C, 63.58; H, 4.25; N, 12.23.

1-(3-fluorobenzoyl)-4-(3-tolyl)thiosemicarbazide (**5b**). CAS number: 894216-38-7. Yield: 89%. M.p. 139-141°C. <sup>1</sup>H-NMR (DMSO-d<sub>6</sub>) δ (ppm): 2.29 (s, 3H, CH<sub>3</sub>); 6.97-7.81 (m, 8H, ArH); 9.73 (s, 1H, NH); 9.79 (s, 1H, NH); 10.64 (s, 1H, NH). Anal. calcd. for C<sub>15</sub>H<sub>14</sub>FN<sub>3</sub>OS: C, 59.39; H, 4.65; N, 13.85. Found: C, 59.46; H, 4.49; N, 13.77.

1-(3-fluorobenzoyl)-4-(4-tolyl)thiosemicarbazide (**6b**). CAS number: 894216-33-2. Yield: 90%. M.p. 176-158°C. <sup>1</sup>H-NMR (DMSO-d<sub>6</sub>) δ (ppm): 2.35 (s, 3H, CH<sub>3</sub>); 7.18-7.88 (m, 8H, ArH); 9.77 (s, 1H, NH); 9.84 (s, 1H, NH); 10.69 (s, 1H, NH). Anal. C<sub>15</sub>H<sub>14</sub>FN<sub>3</sub>OS (C, H, N). Anal. calcd. for C<sub>15</sub>H<sub>14</sub>FN<sub>3</sub>OS: C, 59.39; H, 4.65; N, 13.85. Found: C, 59.28; H, 4.52; N, 13.72.

1,4-di(3-fluorobenzoyl)thiosemicarbazide (**7b**). CAS number: 894237-23-1. Yield: 71%. M.p. 184-186°C. <sup>1</sup>H-NMR (DMSO-d<sub>6</sub>) δ (ppm): 6.81-7.84 (m, 8H, ArH); 9.97 (s, 2H, 2NH); 10.74 (s, 1H, NH). Anal. calcd. for C<sub>14</sub>H<sub>11</sub>F<sub>2</sub>N<sub>3</sub>OS: C, 54.71; H, 3.61; N, 13.67. Found: C, 54.89; H, 3.51; N, 13.46.

4-(3-chlorophenyl)-1-(3-fluorobenzoyl)thiosemicarbazide (**9b**). CAS number: 894227-15-7. Yield: 77%. M.p. 175-177°C. <sup>1</sup>H-NMR (DMSO-d<sub>6</sub>) δ (ppm): 7.29-7.88 (m, 8H, ArH); 9.99 (s, 2H, 2NH); 10.75 (s, 1H, NH). Anal. calcd. for C<sub>14</sub>H<sub>11</sub>ClFN<sub>3</sub>OS: C, 51.93; H, 3.42; N, 12.98. Found: C, 52.03; H, 3.39; N, 12.74.

4-(3-bromophenyl)-1-(3-fluorobenzoyl)thiosemicarbazide (**11b**). Yield: 71%. M.p. 183-185°C. <sup>1</sup>H-NMR (DMSO-d<sub>6</sub>) δ (ppm): 7.35-7.87 (m, 8H, ArH); 10.00 (s, 2H, 2NH); 10.75 (s, 1H, NH). Anal. C<sub>14</sub>H<sub>11</sub>BrFN<sub>3</sub>OS (C, H, N). Anal. calcd. for C<sub>14</sub>H<sub>11</sub>BrFN<sub>3</sub>OS: C, 45.66; H, 3.01; N, 11.41. Found: C, 45.39; H, 3.21; N, 11.68.

1-(3-fluorobenzoyl)-4-(3-iodophenyl)-thiosemicarbazide (**13b**). Yield: 75%. M.p. 202-204°C. <sup>1</sup>H-NMR (DMSO-d<sub>6</sub>) δ (ppm): 7.01-7.89 (m, 8H, ArH); 9.70 (s, 1H, NH); 9.86 (s, 1H, NH); 10.73 (s, 1H, NH). Anal. C<sub>14</sub>H<sub>11</sub>FIN<sub>3</sub>OS (C, H, N). Anal. calcd. for C<sub>14</sub>H<sub>11</sub>FIN<sub>3</sub>OS: C, 40.49; H, 2.67; N, 10.12. Found: C, 40.26; H, 2.81; N, 10.20.

1-(3-fluorobenzoyl)-4-(4-iodophenyl)-thiosemicarbazide (**14b**). Yield: 88%. M.p. 194-196°C. <sup>1</sup>H-NMR (DMSO-d<sub>6</sub>) δ (ppm): 7.16-7.87 (m, 8H, ArH); 9.91 (s, 2H, 2NH); 10.71 (s, 1H, NH). Anal. C<sub>14</sub>H<sub>11</sub>FIN<sub>3</sub>OS (C, H, N). Anal. calcd. for C<sub>14</sub>H<sub>11</sub>FIN<sub>3</sub>OS: C, 40.49; H, 2.67; N, 10.12. Found: C, 40.36; H, 2.89; N, 9.99.

1-(3-fluorobenzoyl)-4-(3-trifluoromethylphenyl)thiosemicarbazide (**15b**). Yield: 71%. M.p. 165-167°C. <sup>1</sup>H-NMR (DMSO-d<sub>6</sub>) δ (ppm): 7.54-7.90 (m, 8H, ArH); 10.06 (s, 2H, NH); 10.77 (s, 1H, NH). Anal. calcd. for C<sub>15</sub>H<sub>11</sub>F<sub>4</sub>N<sub>3</sub>OS: C, 50.42; H, 3.10; N, 11.76. Found: C, 50.37; H, 3.22; N, 11.59.

1-(3-fluorobenzoyl)-4-(4-trifluoromethylphenyl)thiosemicarbazide (**16b**). Yield: 73%. M.p. 249-251°C. <sup>1</sup>H-NMR (DMSO-d<sub>6</sub>) δ (ppm): 7.51-7.87 (m, 8H, ArH); 10.07 (s, 2H, NH); 10.77 (s, 1H, NH). Anal. calcd. for C<sub>15</sub>H<sub>11</sub>F<sub>4</sub>N<sub>3</sub>OS: C, 50.42; H, 3.10; N, 11.76. Found: C, 50.55; H, 3.39; N, 11.78.

4-butyl-1-(4-fluorobenzoyl)thiosemicarbazide (**2c**). CAS number: 443296-09-1. Yield: 66%. M.p. 184-186°C. <sup>1</sup>H-NMR (DMSO-d<sub>6</sub>) δ (ppm): 0.88 (t, 3H, CH<sub>3</sub>, J = 7.5 Hz); 1.25 (sext, 2H, CH<sub>2</sub>, J = 7.2 Hz); 1.46 (q, 2H, CH<sub>2</sub>, J = 7.5 Hz); 3.43 (kw, 2H, CH<sub>2</sub>, J = 6.6 Hz); 7.34 (t, 2H, ArH, J = 9.0 Hz); 7.99 (kw, 2H, ArH, J = 5.7 Hz); 8.11 (s, 1H, NH); 9.25 (s, 1H, NH); 10.34 (s, 1H, NH). Anal. calcd. for C<sub>12</sub>H<sub>16</sub>FN<sub>3</sub>OS: C, 53.51; H, 5.99; N, 15.60. Found: C, 53.49; H, 5.81; N, 15.66.

1-(4-fluorobenzoyl)-4-(1-naphthyl)thiosemicarbazide (**4c**). CAS number: 891549-29-4. Yield: 67%. M.p. 177-179°C. <sup>1</sup>H-NMR (DMSO-d<sub>6</sub>) δ (ppm): 7.37-7.59 (m, 6H, ArH); 7.88-7.16 (m, 5H, ArH); 9.91 (s, 1H, NH); 10.15 (s, 1H, NH); 10.82 (s, 1H, NH). Anal. C<sub>18</sub>H<sub>14</sub>FN<sub>3</sub>OS (C, H, N). Anal. calcd. for C<sub>18</sub>H<sub>14</sub>FN<sub>3</sub>OS: C, 63.70; H, 4.16; N, 12.38. Found: C, 63.69; H, 4.25; N, 12.42.

1-(4-fluorobenzoyl)-4-(3-tolyl)thiosemicarbazide (**5c**). CAS number: 443666-96-4. Yield: 73%. M.p. 178-180°C. <sup>1</sup>H-NMR (DMSO-d<sub>6</sub>) δ (ppm): 2.25 (s, 3H, CH<sub>3</sub>); 7.02-7.03 (m, 2H, ArH); 7.11-7.16 (m, 4H, ArH); 7.89-7.93 (m, 2H, ArH); 9.63 (s, 1H, NH); 9.72 (s, 1H, NH); 10.51 (s, 1H, NH). Anal. C<sub>15</sub>H<sub>14</sub>FN<sub>3</sub>OS (C, H, N). Anal. calcd. for C<sub>15</sub>H<sub>14</sub>FN<sub>3</sub>OS: C, 59.39; H, 4.65; N, 13.85. Found: C, 59.22; H, 4.77; N, 13.91.

1-(4-fluorobenzoyl)-4-(3-fluorophenyl)thiosemicarbazide (**7c**). CAS number: 894237-00-4. Yield: 81%. M.p. 193-195°C. <sup>1</sup>H-NMR (DMSO-d<sub>6</sub>) δ (ppm): 6.99 (t, 1H, ArH, *J* = 7,5 Hz); 7.28-7.48 (m, 5H, ArH); 8.03 (kw, 2H, ArH, *J* = 5,4 Hz); 9.89 (s, 2H, 2NH<sub>2</sub>); 10.61 (s, 1H, NH). Anal. calcd. for C<sub>14</sub>H<sub>11</sub>F<sub>2</sub>N<sub>3</sub>OS: C, 54.71; H, 3.61; N, 13.67. Found: C, 54.70; H, 3.32; N, 13.79.

4-(3-bromophenyl)-1-(4-fluorobenzoyl)thiosemicarbazide (**11c**). Yield: 81%. M.p. 185-187°C. <sup>1</sup>H-NMR (DMSO-d<sub>6</sub>) δ (ppm): 7.27-7.39 (m, 4H, ArH); 7.50-7.54 (m, 1H, ArH); 7.72 (s, 1H, ArH); 8.02 (kw, 2H, ArH, *J* = 5.7); 9.90 (s, 2H, 2 NH<sub>2</sub>); 10.61 (s, 1H, NH). Anal. C<sub>14</sub>H<sub>11</sub>BrFN<sub>3</sub>OS (C, H, N). Anal. calcd. for C<sub>14</sub>H<sub>11</sub>BrFN<sub>3</sub>OS: C, 45.66; H, 3.01; N, 11.41. Found: C, 45.52; H, 3.13; N, 11.55.

1-(4-fluorobenzoyl)-4-(3-iodophenyl)thiosemicarbazide (**13c**). Yield: 79%. M.p. 193-195°C. <sup>1</sup>H-NMR (DMSO-d<sub>6</sub>) δ (ppm): 7.18-7.21 (m, 1H, ArH); 7.41-7.44 (m, 2H, ArH); 7.57-7.61 (m, 2H, ArH); 7.87 (s, 1H, ArH); 8.07-8.09 (m, 2H, ArH); 9.93 (s, 2H, 2NH<sub>2</sub>); 10.66 (s, 1H, NH). Anal. calcd. for C<sub>14</sub>H<sub>11</sub>FIN<sub>3</sub>OS: C, 40.49; H, 2.67; N, 10.12. Found: C, 40.18; H, 2.42; N, 10.33.

1-(4-fluorobenzoyl)-4-(4-iodophenyl)thiosemicarbazide (**14c**). Yield: 90%. M.p. 222-224°C. <sup>1</sup>H-NMR (DMSO-d<sub>6</sub>) δ (ppm): 7.29-7.38 (m, 4H, ArH); 7.67-7.68 (m, 2H, ArH); 8.01-8.03 (m, 2H, ArH); 9.83 (s, 2H, 2NH<sub>2</sub>); 10.59 (s, 1H, NH). Anal. calcd. for C<sub>14</sub>H<sub>11</sub>FIN<sub>3</sub>OS: C, 40.49; H, 2.67; N, 10.12. Found: C, 40.71; H, 2.93; N, 10.09.

1-(4-fluorobenzoyl)-4-(3-trifluoromethylphenyl)thiosemicarbazide (**15c**). CAS number: 905262-01-3. Yield: 85%. M.p. 208-210°C. <sup>1</sup>H-NMR (DMSO-d<sub>6</sub>) δ (ppm): 7.37 (t, 2H, ArH, *J* = 9.0Hz); 7.51-7.60 (m, 2H, ArH); 7.84 (d, 2H, ArH, *J* = 7.2 Hz); 8.04 (kw, 2H, ArH, *J* = 5.4 Hz); 10.00 (s, 2H, 2NH<sub>2</sub>); 10.66 (s, 1H, NH). Anal. C<sub>15</sub>H<sub>11</sub>F<sub>4</sub>N<sub>3</sub>OS (C, H, N). Anal. calcd. for C<sub>15</sub>H<sub>11</sub>F<sub>4</sub>N<sub>3</sub>OS: C, 50.42; H, 3.10; N, 11.76. Found: C, 50.29; H, 3.04; N, 11.50.

1-(4-fluorobenzoyl)-4-(4-trifluoromethylphenyl)thiosemicarbazide (**16c**). Yield: 91%. M.p. 222-224°C. <sup>1</sup>H-NMR (DMSO-d<sub>6</sub>) δ (ppm): 7.37 (t, 2H, ArH, *J* = 9.0Hz); 7.68-7.76 (m, 4H, ArH); 8.04 (kw, 2H, ArH, *J* = 5.7 Hz); 10.00 (s, 2H, 2NH<sub>2</sub>); 10.67 (s, 1H, NH). Anal. calcd. for C<sub>15</sub>H<sub>11</sub>F<sub>4</sub>N<sub>3</sub>OS: C, 50.42; H, 3.10; N, 11.76. Found: C, 50.51; H, 2.97; N, 11.45.

### Physicochemical characterization of the 1,2,4-triazole-3-thiones

5-(2-fluorophenyl)-4-propyl-2,4-dihydro-3*H*-1,2,4-triazole-3-thione (**1at**). CAS number: 1553509-98-0. Yield: 48%. M.p. 127-130°C. <sup>1</sup>H-NMR (DMSO-d<sub>6</sub>) δ (ppm): 0.63-0.71 (m, 3H, CH<sub>3</sub>); 1.44-1.55 (m, 2H, CH<sub>2</sub>); 3.79-3.88 (m, 2H, CH<sub>2</sub>); 7.40-7.71 (m, 4H, ArH); 14.11 (s, 1H, NH). Anal. calcd. for C<sub>11</sub>H<sub>12</sub>FN<sub>3</sub>S: C, 55.68; H, 5.10; N, 17.71. Found: C, 55.52; H, 5.33; N, 17.49.

4-butyl-5-(2-fluorophenyl)-2,4-dihydro-3*H*-1,2,4-triazole-3-thione (**2at**). CAS number: 892217-67-3. Yield: 51%. M.p. >300°C. <sup>1</sup>H-NMR (DMSO-d<sub>6</sub>) δ (ppm): 0.69 (t, 3H, CH<sub>3</sub>, *J* = 7.5 Hz); 1.08 (sext, 2H, CH<sub>2</sub>, *J* = 7.5 Hz); 1.44 (quint, 2H, CH<sub>2</sub>, *J* = 7.5 Hz); 14.11 (s, 1H, NH). Anal. calcd. for C<sub>12</sub>H<sub>14</sub>FN<sub>3</sub>S: C, 57.35; H, 5.61; N, 16.72. Found: C, 57.33; H, 5.39; N, 16.90.

4-(1-naphthyl)-5-(2-fluorophenyl)-2,4-dihydro-3*H*-1,2,4-triazole-3-thione (**4at**). CAS number: 496787-38-3. Yield: 78%. M.p. 242-244°C. <sup>1</sup>H-NMR (DMSO-*d*<sub>6</sub>) δ (ppm): 7.07-7.14 (m, 2H, ArH); 7.40-7.45 (m, 3H, ArH); 7.54-7.58 (m, 4H, ArH); 7.99-8.02 (m, 2H, ArH); 14.44 (s, 1H, NH). Anal. calcd. for C<sub>18</sub>H<sub>12</sub>FN<sub>3</sub>S: C, 67.27; H, 3.76; N, 13.08. Found: C, 66.98; H, 3.32; N, 12.96.

5-(2-fluorophenyl)-4-(3-tolyl)-2,4-dihydro-3*H*-1,2,4-triazole-3-thione (**5at**). CAS number: 694478-51-8. Yield: 90%. M.p. 214-216°C. <sup>1</sup>H-NMR (DMSO-*d*<sub>6</sub>) δ (ppm): 2.25 (s, 3H, CH<sub>3</sub>); 7.04-7.57 (m, 8H, ArH); 14.29 (s, 1H, NH). Anal. calcd. for C<sub>15</sub>H<sub>12</sub>FN<sub>3</sub>S: C, 63.14; H, 4.24; N, 14.73. Found: C, 63.03; H, 4.41; N, 14.56.

5-(2-fluorophenyl)-4-(3-fluorophenyl)-2,4-dihydro-3*H*-1,2,4-triazole-3-thione (**7at**). Yield: 78%. M.p. 202-204°C. <sup>1</sup>H-NMR (DMSO-*d*<sub>6</sub>) δ (ppm): 7.27-7.56 (m, 8H, ArH); 14.32 (s, 1H, NH). Anal. calcd. for C<sub>14</sub>H<sub>9</sub>F<sub>2</sub>N<sub>3</sub>S: C, 58.12; H, 3.14; N, 14.53. Found: C, 57.91; H, 3.18; N, 14.67.

4-(3-chlorophenyl)-5-(2-fluorophenyl)-2,4-dihydro-3*H*-1,2,4-triazole-3-thione (**9at**). CAS number: 694473-88-6. Yield: 75%. M.p. 215-217°C. <sup>1</sup>H-NMR (DMSO-*d*<sub>6</sub>) δ (ppm): 7.25-7.38 (m, 4H, ArH); 7.52-7.61 (m, 4H, ArH); 14.31 (s, 1H, NH). Anal. calcd. for C<sub>14</sub>H<sub>9</sub>ClFN<sub>3</sub>S: C, 55.00; H, 2.97; N, 13.74. Found: C, 55.03; H, 3.13; N, 13.56.

4-(3-bromophenyl)-5-(2-fluorophenyl)-2,4-dihydro-3*H*-1,2,4-triazole-3-thione (**11at**). Yield: 68%. M.p. >300°C. <sup>1</sup>H-NMR (DMSO-*d*<sub>6</sub>) δ (ppm): 7.13-7.65 (m, 8H, ArH); 14.28 (s, 1H, NH). Anal. calcd. for C<sub>14</sub>H<sub>9</sub>BrFN<sub>3</sub>S: C, 48.01; H, 2.59; N, 12.00. Found: C, 47.99; H, 2.22; N, 12.09.

4-(3-iodophenyl)-5-(2-fluorophenyl)-2,4-dihydro-3*H*-1,2,4-triazole-3-thione (**13at**). Yield: 65%. M.p. 218-220°C. <sup>1</sup>H-NMR (DMSO-*d*<sub>6</sub>) δ (ppm): 7.21-7.32 (m, 4H, ArH); 7.64-7.57 (m, 2H, ArH); 7.73-7.78 (m, 2H, ArH); 14.36 (s, 1H, NH). Anal. calcd. for C<sub>14</sub>H<sub>9</sub>FIN<sub>3</sub>S: C, 42.33; H, 2.28; N, 10.58. Found: C, 42.38; H, 2.53; N, 10.50.

4-(4-iodophenyl)-5-(2-fluorophenyl)-2,4-dihydro-3*H*-1,2,4-triazole-3-thione (**14at**). Yield: 88%. M.p. 284-286°C. <sup>1</sup>H-NMR (DMSO-*d*<sub>6</sub>) δ (ppm): 7.05-7.30 (m, 4H, ArH); 7.48-7.55 (m, 2H, ArH); 7.73-7.81 (m, 2H, ArH); 14.31 (s, 1H, NH). Anal. calcd. for C<sub>14</sub>H<sub>9</sub>FIN<sub>3</sub>S: C, 42.33; H, 2.28; N, 10.58. Found: C, 42.50; H, 2.51; N, 10.36.

4-(3-trifluoromethylphenyl)-5-(2-fluorophenyl)-2,4-dihydro-3*H*-1,2,4-triazole-3-thione (**15at**). Yield: 65%. M.p. 212-214°C. <sup>1</sup>H-NMR (DMSO-*d*<sub>6</sub>) δ (ppm): 7.21-7.60 (m, 8H, ArH); 14.36 (s, 1H, NH). Anal. calcd. for C<sub>15</sub>H<sub>9</sub>F<sub>4</sub>N<sub>3</sub>S: C, 53.10; H, 2.67; N, 12.38. Found: C, 53.24; H, 2.45; N, 12.35.

4-(4-trifluoromethylphenyl)-5-(2-fluorophenyl)-2,4-dihydro-3*H*-1,2,4-triazole-3-thione (**16at**). Yield: 68%. M.p. 124-126°C. <sup>1</sup>H-NMR (DMSO-*d*<sub>6</sub>) δ (ppm): 7.19-7.96 (m, 8H, ArH); 14.39 (s, 1H, NH). Anal. calcd. for C<sub>15</sub>H<sub>9</sub>F<sub>4</sub>N<sub>3</sub>S: C, 53.10; H, 2.67; N, 12.38. Found: C, 52.93; H, 2.50; N, 12.76.

5-(3-fluorophenyl)-4-propyl-2,4-dihydro-3*H*-1,2,4-triazole-3-thione (**1bt**). CAS number: 1549486-52-3. Yield: 65%. M.p. 126-128°C. <sup>1</sup>H-NMR (DMSO-*d*<sub>6</sub>) δ (ppm): 0.69 (t, 3H, CH<sub>3</sub>, *J* = 7.5 Hz); 1.51 (sext, 2H, CH<sub>2</sub>, *J* = 7.5 Hz); 4.01 (t, 2H, CH<sub>2</sub>, *J* = 7.5 Hz); 7.43-7.69 (m, 4H, ArH); 14.04 (s, 1H, NH). Anal. calcd. for C<sub>11</sub>H<sub>12</sub>FN<sub>3</sub>S: C, 55.68; H, 5.10; N, 17.71. Found: C, 55.73; H, 5.09; N, 17.47.

5-(3-fluorophenyl)-4-(1-naphthyl)-2,4-dihydro-3*H*-1,2,4-triazole-3-thione (**4bt**). Yield: 67%. M.p. 287-289°C. <sup>1</sup>H-NMR (DMSO-*d*<sub>6</sub>) δ (ppm): 7.10-7.78 (m, 9H, ArH); 8.14 (dd, 2H, ArH, *J* = 4.2 Hz); 14.45 (s, 1H, NH). Anal. C<sub>18</sub>H<sub>12</sub>FN<sub>3</sub>S (C, H, N). Anal. calcd. for C<sub>18</sub>H<sub>12</sub>FN<sub>3</sub>S: C, 67.27; H, 3.76; N, 13.08. Found: C, 67.35; H, 3.52; N, 13.19.

5-(3-fluorophenyl)-4-(3-tolyl)-2,4-dihydro-3*H*-1,2,4-triazole-3-thione (**5bt**). Yield: 80%. M.p. 234-236°C. <sup>1</sup>H-NMR (DMSO-*d*<sub>6</sub>) δ (ppm): 2.31 (s, 3H, CH<sub>3</sub>); 7.09-7.44 (m, 8H, ArH); 14.24 (s, 1H, NH). Anal. calcd. for C<sub>15</sub>H<sub>12</sub>FN<sub>3</sub>S: C, 63.14; H, 4.24; N, 14.73. Found: C, 62.97; H, 3.99; N, 14.50.

5-(3-fluorophenyl)-4-(4-tolyl)-2,4-dihydro-3*H*-1,2,4-triazole-3-thione (**6bt**). Yield: 81%. M.p. 239-241°C. <sup>1</sup>H-NMR (DMSO-*d*<sub>6</sub>) δ (ppm): 2.36 (s, 3H, CH<sub>3</sub>); 7.11-8.19 (m, 8H, ArH); 14.22 (s, 1H, NH). Anal. calcd. for C<sub>15</sub>H<sub>12</sub>FN<sub>3</sub>S: C, 63.14; H, 4.24; N, 14.73. Found: C, 63.22; H, 4.21; N, 14.58.

4,5-di(3-fluorophenyl)-2,4-dihydro-3*H*-1,2,4-triazole-3-thione (**7bt**). Yield: 65%. M.p. 254-256°C. <sup>1</sup>H-NMR (DMSO-*d*<sub>6</sub>) δ (ppm): 7.15-7.57 (m, 8H, ArH); 14.29 (s, 1H, NH). Anal. calcd. for C<sub>14</sub>H<sub>9</sub>F<sub>2</sub>N<sub>3</sub>S: C, 58.12; H, 3.14; N, 14.53. Found: C, 58.24; H, 3.26; N, 14.50.

4-(3-chlorophenyl)-5-(3-fluorophenyl)-2,4-dihydro-3*H*-1,2,4-triazole-3-thione (**9bt**). Yield: 68%. M.p. 256-258°C. <sup>1</sup>H-NMR (DMSO-*d*<sub>6</sub>) δ (ppm): 7.14-7.65 (m, 8H, ArH); 14.28 (s, 1H, NH). Anal. calcd. for C<sub>14</sub>H<sub>9</sub>ClFN<sub>3</sub>S: C, 55.00; H, 2.97; N, 13.74. Found: C, 54.92; H, 3.11; N, 13.26.

4-(3-bromophenyl)-5-(3-fluorophenyl)-2,4-dihydro-3*H*-1,2,4-triazole-3-thione (**11bt**). Yield: 66%. M.p. 255-257°C. <sup>1</sup>H-NMR (DMSO-*d*<sub>6</sub>) δ (ppm): 7.14-7.77 (m, 8H, ArH); 14.29 (s, 1H, NH). Anal. calcd. for C<sub>14</sub>H<sub>9</sub>BrFN<sub>3</sub>S: C, 48.01; H, 2.59; N, 12.00. Found: C, 47.99; H, 2.25; N, 12.21.

4-(3-iodophenyl)-5-(3-fluorophenyl)-2,4-dihydro-3*H*-1,2,4-triazole-3-thione (**13bt**). Yield: 71%. M.p. 251-253°C. <sup>1</sup>H-NMR (DMSO-*d*<sub>6</sub>) δ (ppm): 7.13-7.17 (m, 4H, ArH); 7.29-7.32 (m, 4H, ArH); 14.30 (s, 1H, NH). Anal. calcd. for C<sub>14</sub>H<sub>9</sub>FIN<sub>3</sub>S: C, 42.33; H, 2.28; N, 10.58. Found: C, 42.25; H, 2.18; N, 10.71.

4-(4-iodophenyl)-5-(3-fluorophenyl)-2,4-dihydro-3*H*-1,2,4-triazole-3-thione (**14bt**). Yield: 77%. M.p. 234-236°C. <sup>1</sup>H-NMR (DMSO-*d*<sub>6</sub>) δ (ppm): 7.13-7.89 (m, 8H, ArH); 14.26 (s, 1H, NH). Anal. calcd. for C<sub>14</sub>H<sub>9</sub>FIN<sub>3</sub>S: C, 42.33; H, 2.28; N, 10.58. Found: C, 42.42; H, 2.22; N, 10.31.

4-(3-trifluoromethylphenyl)-5-(3-fluorophenyl)-2,4-dihydro-3*H*-1,2,4-triazole-3-thione (**15bt**). Yield: 60%. M.p. 239-241°C. <sup>1</sup>H-NMR (DMSO-*d*<sub>6</sub>) δ (ppm): 7.14-7.93 (m, 8H, ArH); 14.30 (s, 1H, NH). Anal. calcd. for C<sub>15</sub>H<sub>9</sub>F<sub>4</sub>N<sub>3</sub>S: C, 53.10; H, 2.67; N, 12.38. Found: C, 53.26; H, 2.60; N, 12.21.

4-(4-trifluoromethylphenyl)-5-(3-fluorophenyl)-2,4-dihydro-3*H*-1,2,4-triazole-3-thione (**16bt**). Yield: 62%. M.p. 249-251°C. <sup>1</sup>H-NMR (DMSO-*d*<sub>6</sub>) δ (ppm): 7.10-8.06 (m, 8H, ArH); 14.32 (s, 1H, NH). Anal. calcd. for C<sub>15</sub>H<sub>9</sub>F<sub>4</sub>N<sub>3</sub>S: C, 53.10; H, 2.67; N, 12.38. Found: C, 52.99; H, 2.51; N, 12.50.

4-butyl-5-(4-fluorophenyl)-2,4-dihydro-3*H*-1,2,4-triazole-3-thione (**2ct**). CAS number: 694456-05-8. Yield: 65%. M.p. 108-110°C. <sup>1</sup>H-NMR (DMSO-*d*<sub>6</sub>) δ (ppm): 0.73 (t, 3H, CH<sub>3</sub>, *J* = 7.2 Hz); 1.11 (sext, 2H, CH<sub>2</sub>, *J* = 7.2 Hz); 1.48 (q, 2H, CH<sub>2</sub>, *J* = 7.5 Hz); 4.01 (t, 2H, CH<sub>2</sub>, *J* = 7.5 Hz); 7.41 (t, 2H, ArH, *J* = 9.0 Hz); 7.43 (m, 2H, ArH); 13.90 (s, 1H, NH). Anal. calcd. for C<sub>12</sub>H<sub>14</sub>FN<sub>3</sub>S: C, 57.35; H, 5.61; N, 16.72. Found: C, 57.21; H, 5.88; N, 16.91.

5-(4-fluorophenyl)-4-(3-tolyl)-2,4-dihydro-3*H*-1,2,4-triazole-3-thione (**5ct**). CAS number: 1044824-22-1. Yield: 86%. M.p. 256-258°C. <sup>1</sup>H-NMR (DMSO-*d*<sub>6</sub>) δ (ppm): 2.32 (s, 3H, CH<sub>3</sub>); 7.12-7.39 (m, 8H, ArH); 14.13 (s, 1H, NH). Anal. calcd. for C<sub>15</sub>H<sub>12</sub>FN<sub>3</sub>S: C, 63.14; H, 4.24; N, 14.73. Found: C, 62.95; H, 4.20; N, 14.50.

5-(4-fluorophenyl)-4-(3-fluorophenyl)-2,4-dihydro-3*H*-1,2,4-triazole-3-thione (**7ct**). Yield: 79%. M.p. 194-196°C. <sup>1</sup>H-NMR (DMSO-*d*<sub>6</sub>) δ (ppm): 6.88-6.92 (m, 1H, ArH); 7.08-7.16 (m, 3H, ArH); 7.20-7.26 (m, 3H, ArH); 7.39-7.42 (m, 1H, ArH); 14.29 (s, 1H, NH). Anal. calcd. for C<sub>14</sub>H<sub>9</sub>F<sub>2</sub>N<sub>3</sub>S: C, 58.12; H, 3.14; N, 14.53. Found: C, 58.03; H, 3.12; N, 14.59.

4-(3-bromophenyl)-5-(4-fluorophenyl)-2,4-dihydro-3*H*-1,2,4-triazole-3-thione (**11ct**). Yield: 79%. M.p. 276-278°C. <sup>1</sup>H-NMR (DMSO-*d*<sub>6</sub>) δ (ppm): 7.25-7.65 (t, 2H, ArH, *J* = 9.0 Hz); 7.37-7.48 (m, 4H, ArH); 7.68-7.75 (m, 2H, ArH); 14.20 (s, 1H, NH). Anal. calcd. for C<sub>14</sub>H<sub>9</sub>BrFN<sub>3</sub>S: C, 48.01; H, 2.59; N, 12.00. Found: C, 47.86; H, 2.53; N, 12.15.

4-(3-iodophenyl)-5-(4-fluorophenyl)-2,4-dihydro-3*H*-1,2,4-triazole-3-thione (**13ct**). Yield: 85%. M.p. 251-253°C. <sup>1</sup>H-NMR (DMSO-*d*<sub>6</sub>) δ (ppm): 7.24-7.30 (m, 4H, ArH); 7.37-7.40 (m, 2H, ArH); 7.84-7.86 (m, 2H, ArH); 14.17 (s, 1H, NH). Anal. calcd. for C<sub>14</sub>H<sub>9</sub>FIN<sub>3</sub>S: C, 42.33; H, 2.28; N, 10.58. Found: C, 42.03; H, 2.01; N, 10.60.

4-(4-iodophenyl)-5-(4-fluorophenyl)-2,4-dihydro-3*H*-1,2,4-triazole-3-thione (**14ct**). Yield: 86%. M.p. 214-216°C. <sup>1</sup>H-NMR (DMSO-*d*<sub>6</sub>) δ (ppm): 7.24-7.32 (m, 4H, ArH); 7.43-7.46 (m, 2H, ArH); 7.92-7.93 (m, 2H, ArH); 14.25 (s, 1H, NH). Anal. calcd. for C<sub>14</sub>H<sub>9</sub>FIN<sub>3</sub>S: C, 42.33; H, 2.28; N, 10.58. Found: C, 42.51; H, 2.40; N, 10.37.

4-(3-trifluoromethylphenyl)-5-(4-fluorophenyl)-2,4-dihydro-3*H*-1,2,4-triazole-3-thione (**15ct**). Yield: 77%. M.p. 283-285°C. <sup>1</sup>H-NMR (DMSO-*d*<sub>6</sub>) δ (ppm): 7.23-7.26 (m, 2H, ArH); 7.37-7.39 (m, 2H, ArH); 7.70-7.73 (m, 2H, ArH); 7.85-7.90 (m, 2H, ArH); 14.25 (s, 1H, NH). Anal. calcd. for C<sub>15</sub>H<sub>9</sub>F<sub>4</sub>N<sub>3</sub>S: C, 53.10; H, 2.67; N, 12.38. Found: C, 53.08; H, 2.63; N, 12.55.



4-(4-trifluoromethylphenyl)-5-(4-fluorophenyl)-2,4-dihydro-3H-1,2,4-triazole-3-thione (**16ct**). Yield: 80%. M.p. 282-284°C. <sup>1</sup>H-NMR (DMSO-d<sub>6</sub>) δ (ppm): 7.23-7.39 (m, 4H, ArH); 7.51 (d, 2H, ArH, *J* = 8.4 Hz); 8.03 (d, 2H, ArH, *J* = 8.4 Hz); 14.23 (s, 1H, NH). Anal. calcd. for C<sub>15</sub>H<sub>9</sub>F<sub>4</sub>N<sub>3</sub>S: C, 53.10; H, 2.67; N, 12.38. Found: C, 53.11; H, 2.54; N, 12.43.

**List of 466 descriptors used in QSAR modeling:**

molecular weight [mass\_au]  
log P  
length  
width  
length/width  
depth  
width/depth  
log P/width/depth  
box volume [angstrom<sup>3</sup>]  
log P/box volume  
box area [angstrom<sup>2</sup>]  
log P/box area  
box cross section  
log P/box cross section  
H-bond donor count  
H-bond acceptor count  
total accessible surface area [angstrom<sup>2</sup>]  
nonpolar area  
rotatable bond count  
rotatable bond count nonterminal  
all count  
Hydrogen count  
Carbon count  
Oxygen count  
Fluorine count  
Chlorine count  
Bromine count  
all bond count  
single bond count  
Csp<sup>3</sup> bonded to 2 C  
Csp<sup>3</sup> bonded to 1 C  
Csp<sup>2</sup> bonded to 3 C  
Csp<sup>2</sup> bonded to 2 C  
amide count

sec-amine count  
tertiary-amine count  
methyl count  
methylene count  
ring count all  
ring count all aromatic  
ring count all nonaromatic  
ring count 5 member  
ring count nonaromatic 5  
ring count 6 member  
ring count aromatic 6  
ring size smallest  
energy dielectric [kcal/mol]  
heat of formation [kcal/mol]  
highest partial charge on H  
highest partial charge on donatable H  
lowest partial charge on free H acceptor  
lowest partial charge on O  
lowest partial charge on N  
highest partial charge on C  
lowest partial charge on C  
second highest partial charge on H  
third highest partial charge on H  
highest partial charge on N  
dipole moment from partial charges [debye]  
highest electrophilic susceptibility  
highest nucleophilic susceptibility  
highest radical susceptibility  
highest electrophilic susceptibility on C  
highest nucleophilic susceptibility on C  
highest radical susceptibility on C  
highest electrophilic susceptibility on N  
highest nucleophilic susceptibility on N  
highest radical susceptibility on N  
highest electrophilic susceptibility on O  
highest nucleophilic susceptibility on O  
highest radical susceptibility on O  
highest electrophilic susceptibility on H  
highest nucleophilic susceptibility on H  
highest radical susceptibility on H  
HOMO energy [eV]

LUMO energy [eV]  
HOMO-LUMO gap  
dipole moment [debye]  
solvent accessible surf area [angstrom<sup>2</sup>]  
polarizability [angstrom<sup>3</sup>]  
highest partial charge  
lowest partial charge  
total positive partial charge  
total negative partial charge  
highest partial charge/total positive partial charge  
lowest partial charge/total negative partial charge  
partial positive surface area  
partial positive surface area\*total positive partial charge  
partial negative surface area  
partial negative surface area\*total negative partial charge  
partial positive surface area-partial negative surface area  
partial positive surface area-partial negative surface area-partial negative surface area\*total negative  
partial charge  
partial positive surface area/total accessible surface area  
partial negative surface area/total accessible surface area  
partial positive surface area\*total positive partial charge/total accessible surface area  
partial negative surface area\*total negative partial charge/total accessible surface area  
abs(charge) weighted area  
charge weighted area  
charge weighted polar area  
charge weighted nonpolar area  
atomic charge weighted positive area  
atomic charge weighted negative area  
atomic charge weighted positive area-atomic charge weighted negative area  
atomic charge weighted positive area/total accessible surface area  
atomic charge weighted negative area/total accessible surface area  
hydrogen donor partial surface area  
hydrogen donor partial surface area/total accessible surface area  
high charge partial surface area  
high charge partial surface area/total accessible surface area  
high positive charge partial surface area  
high positive charge partial surface area/total accessible surface area  
high negative charge partial surface area  
high negative charge partial surface area/total accessible surface area  
electrophilic weighted area  
nucleophilic weighted area

radical weighted area  
high electrophilic partial area  
high nucleophilic partial area  
high radical partial area  
hydrophobic dipole  
hydrophobicity weighted area  
hydrophobicity weighted positive area  
hydrophobicity weighted negative area  
hydrophobicity weighted positive area/total accessible surface area  
hydrophobicity weighted negative area/total accessible surface area  
nonpolar area/accessible area  
width>7  
width>8  
width>9  
width>10  
width>11  
length>7  
length>8  
length>9  
length>10  
length>11  
length>12  
length>13  
length>14  
length>15  
length>16  
length>17  
length>18  
molecular weight>240  
molecular weight>260  
molecular weight>280  
molecular weight>300  
molecular weight>320  
molecular weight>340  
molecular weight>360  
molecular weight>380  
molecular weight>400  
log P/MW  
length/MW  
width/MW  
length/width/MW

depth/MW  
width/depth/MW  
log P/width/depth/MW  
box volume/MW  
box area/MW  
box cross section/MW  
H-bond donor count/MW  
H-bond acceptor count/MW  
total accessible surface area/MW  
nonpolar area/MW  
molecule count/MW  
rotatable bond count/MW  
rotatable bond count nonterminal/MW  
all count/MW  
Hydrogen count/MW  
Carbon count/MW  
Nitrogen count/MW  
Oxygen count/MW  
Fluorine count/MW  
Sulfur count/MW  
Chlorine count/MW  
Bromine count/MW  
all bond count/MW  
single bond count/MW  
double bond count/MW  
Csp<sup>3</sup> bonded to 2 C/MW  
Csp<sup>3</sup> bonded to 1 C/MW  
Csp<sup>2</sup> bonded to 3 C/MW  
Csp<sup>2</sup> bonded to 2 C/MW  
Csp<sup>2</sup> bonded to 1 C/MW  
amide count/MW  
sec-amine count/MW  
tertiary-amine count/MW  
methyl count/MW  
methylene count/MW  
ring count all/MW  
ring count all aromatic/MW  
ring count all nonaromatic/MW  
ring count 5 member/MW  
ring count nonaromatic 5/MW  
ring count 6 member/MW

ring count aromatic 6/MW  
ring size smallest/MW  
ring size largest/MW  
energy dielectric/MW  
heat of formation/MW  
highest partial charge on H/MW  
highest partial charge on donatable H/MW  
lowest partial charge on free H acceptor/MW  
lowest partial charge on O/MW  
lowest partial charge on N/MW  
highest partial charge on C/MW  
lowest partial charge on C/MW  
second highest partial charge on H/MW  
third highest partial charge on H/MW  
highest partial charge on N/MW  
dipole moment from partial charges/MW  
highest electrophilic susceptibility/MW  
highest nucleophilic susceptibility/MW  
highest radical susceptibility/MW  
highest nucleophilic susceptibility on C/MW  
highest radical susceptibility on C/MW  
highest nucleophilic susceptibility on N/MW  
highest nucleophilic susceptibility on O/MW  
HOMO energy/MW  
LUMO energy/MW  
HOMO-LUMO gap/MW  
dipole moment/MW  
solvent accessible surf area/MW  
polarizability/MW  
highest partial charge/MW  
lowest partial charge/MW  
total positive partial charge/MW  
total negative partial charge/MW  
molecular weight<sup>2</sup>  
log P<sup>2</sup>  
length<sup>2</sup>  
width<sup>2</sup>  
length/width<sup>2</sup>  
depth<sup>2</sup>  
width/depth<sup>2</sup>  
log P/width/depth<sup>2</sup>

box volume<sup>2</sup>  
box area<sup>2</sup>  
box cross section<sup>2</sup>  
log P/box cross section<sup>2</sup>  
H-bond donor count<sup>2</sup>  
H-bond acceptor count<sup>2</sup>  
total accessible surface area<sup>2</sup>  
nonpolar area<sup>2</sup>  
rotatable bond count<sup>2</sup>  
rotatable bond count nonterminal<sup>2</sup>  
all count<sup>2</sup>  
Hydrogen count<sup>2</sup>  
Carbon count<sup>2</sup>  
Fluorine count<sup>2</sup>  
all bond count<sup>2</sup>  
single bond count<sup>2</sup>  
Csp<sup>3</sup> bonded to 2 C<sup>2</sup>  
Csp<sup>3</sup> bonded to 1 C<sup>2</sup>  
Csp<sup>2</sup> bonded to 3 C<sup>2</sup>  
Csp<sup>2</sup> bonded to 2 C<sup>2</sup>  
methylene count<sup>2</sup>  
ring count all<sup>2</sup>  
ring count all aromatic<sup>2</sup>  
ring count 6 member<sup>2</sup>  
ring count aromatic 6<sup>2</sup>  
ring size smallest<sup>2</sup>  
energy dielectric<sup>2</sup>  
heat of formation<sup>2</sup>  
highest partial charge on H<sup>2</sup>  
highest partial charge on donatable H<sup>2</sup>  
lowest partial charge on free H acceptor<sup>2</sup>  
lowest partial charge on O<sup>2</sup>  
lowest partial charge on N<sup>2</sup>  
highest partial charge on C<sup>2</sup>  
lowest partial charge on C<sup>2</sup>  
second highest partial charge on H<sup>2</sup>  
third highest partial charge on H<sup>2</sup>  
highest partial charge on N<sup>2</sup>  
dipole moment from partial charges<sup>2</sup>  
highest electrophilic susceptibility<sup>2</sup>  
highest nucleophilic susceptibility<sup>2</sup>

highest radical susceptibility<sup>2</sup>  
highest electrophilic susceptibility on C<sup>2</sup>  
highest nucleophilic susceptibility on C<sup>2</sup>  
highest radical susceptibility on C<sup>2</sup>  
highest nucleophilic susceptibility on N<sup>2</sup>  
highest radical susceptibility on N<sup>2</sup>  
highest nucleophilic susceptibility on O<sup>2</sup>  
highest radical susceptibility on O<sup>2</sup>  
HOMO energy<sup>2</sup>  
LUMO energy<sup>2</sup>  
HOMO-LUMO gap<sup>2</sup>  
dipole moment<sup>2</sup>  
solvent accessible surf area<sup>2</sup>  
polarizability<sup>2</sup>  
ln(molecular weight)  
ln(log P)  
ln(length)  
ln(width)  
ln(length/width)  
ln(depth)  
ln(width/depth)  
ln(log P/width/depth)  
ln(box volume)  
ln(log P/box volume)  
ln(box area)  
ln(log P/box area)  
ln(box cross section)  
ln(log P/box cross section)  
ln(H-bond donor count)  
ln(H-bond acceptor count)  
ln(total accessible surface area)  
ln(nonpolar area)  
ln(rotatable bond count)  
ln(rotatable bond count nonterminal)  
ln( all count)  
ln( Hydrogen count)  
ln( Carbon count)  
ln( Fluorine count)  
ln(all bond count)  
ln(single bond count)  
ln(Csp<sup>2</sup> bonded to 3 C)



ln(Csp<sup>2</sup> bonded to 2 C)  
ln(ring count all)  
ln(ring count all aromatic)  
ln(ring count 6 member)  
ln(ring count aromatic 6)  
ln(ring size smallest)  
ln(highest partial charge on H)  
ln(highest partial charge on donatable H)  
ln(highest partial charge on C)  
ln(second highest partial charge on H)  
ln(third highest partial charge on H)  
ln(dipole moment from partial charges)  
ln(highest electrophilic susceptibility)  
ln(highest nucleophilic susceptibility)  
ln(highest radical susceptibility)  
ln(highest electrophilic susceptibility on C)  
ln(highest nucleophilic susceptibility on C)  
ln(highest radical susceptibility on C)  
ln(highest electrophilic susceptibility on N)  
ln(highest nucleophilic susceptibility on N)  
ln(highest radical susceptibility on N)  
ln(highest electrophilic susceptibility on H)  
ln(highest nucleophilic susceptibility on H)  
ln(highest radical susceptibility on H)  
ln(HOMO-LUMO gap)  
ln(dipole moment)  
ln(solvent accessible surf area)  
ln(polarizability)  
1.0/molecular weight  
1.0/log P  
1.0/length  
1.0/width  
1.0/length/width  
1.0/depth  
1.0/width/depth  
1.0/log P/width/depth  
1.0/box volume  
1.0/log P/box volume  
1.0/box area  
1.0/log P/box area  
1.0/box cross section

1.0/log P/box cross section  
1.0/H-bond donor count  
1.0/H-bond acceptor count  
1.0/total accessible surface area  
1.0/nonpolar area  
1.0/rotatable bond count  
1.0/rotatable bond count nonterminal  
1.0/ all count  
1.0/ Hydrogen count  
1.0/ Carbon count  
1.0/ Fluorine count  
1.0/all bond count  
1.0/single bond count  
1.0/Csp<sup>2</sup> bonded to 3 C  
1.0/Csp<sup>2</sup> bonded to 2 C  
1.0/ring count all  
1.0/ring count all aromatic  
1.0/ring count 6 member  
1.0/ring count aromatic 6  
1.0/ring size smallest  
1.0/energy dielectric  
1.0/heat of formation  
1.0/highest partial charge on H  
1.0/highest partial charge on donatable H  
1.0/lowest partial charge on free H acceptor  
1.0/lowest partial charge on N  
1.0/highest partial charge on C  
1.0/lowest partial charge on C  
1.0/second highest partial charge on H  
1.0/third highest partial charge on H  
1.0/highest partial charge on N  
1.0/dipole moment from partial charges  
1.0/highest electrophilic susceptibility  
1.0/highest nucleophilic susceptibility  
1.0/highest radical susceptibility  
1.0/highest electrophilic susceptibility on C  
1.0/highest nucleophilic susceptibility on C  
1.0/highest radical susceptibility on C  
1.0/highest electrophilic susceptibility on N  
1.0/highest nucleophilic susceptibility on N  
1.0/highest radical susceptibility on N

1.0/highest electrophilic susceptibility on H  
1.0/highest nucleophilic susceptibility on H  
1.0/highest radical susceptibility on H  
1.0/HOMO energy  
1.0/LUMO energy  
1.0/HOMO-LUMO gap  
1.0/dipole moment  
1.0/solvent accessible surf area  
1.0/polarizability  
sqrt(molecular weight)  
sqrt(log P)  
sqrt(length)  
sqrt(width)  
sqrt(length/width)  
sqrt(depth)  
sqrt(width/depth)  
sqrt(log P/width/depth)  
sqrt(box volume)  
sqrt(log P/box volume)  
sqrt(box area)  
sqrt(log P/box area)  
sqrt(box cross section)  
sqrt(log P/box cross section)  
sqrt(H-bond donor count)  
sqrt(H-bond acceptor count)  
sqrt(total accessible surface area)  
sqrt(nonpolar area)  
sqrt(rotatable bond count)  
sqrt(rotatable bond count nonterminal)  
sqrt( all count)  
sqrt( Hydrogen count)  
sqrt( Carbon count)  
sqrt( Fluorine count)  
sqrt(all bond count)  
sqrt(single bond count)  
sqrt(Csp<sup>2</sup> bonded to 3 C)  
sqrt(Csp<sup>2</sup> bonded to 2 C)  
sqrt(ring count all)  
sqrt(ring count all aromatic)  
sqrt(ring count 6 member)  
sqrt(ring count aromatic 6)

sqrt(ring size smallest)  
 sqrt(highest partial charge on H)  
 sqrt(highest partial charge on donatable H)  
 sqrt(highest partial charge on C)  
 sqrt(second highest partial charge on H)  
 sqrt(third highest partial charge on H)  
 sqrt(dipole moment from partial charges)  
 sqrt(highest electrophilic susceptibility)  
 sqrt(highest nucleophilic susceptibility)  
 sqrt(highest radical susceptibility)  
 sqrt(highest electrophilic susceptibility on C)  
 sqrt(highest nucleophilic susceptibility on C)  
 sqrt(highest radical susceptibility on C)  
 sqrt(highest electrophilic susceptibility on N)  
 sqrt(highest nucleophilic susceptibility on N)  
 sqrt(highest radical susceptibility on N)  
 sqrt(highest electrophilic susceptibility on H)  
 sqrt(highest nucleophilic susceptibility on H)  
 sqrt(highest radical susceptibility on H)  
 sqrt(HOMO-LUMO gap)  
 sqrt(dipole moment)  
 sqrt(solvent accessible surf area)  
 sqrt(polarizability)

### Docking binding poses:

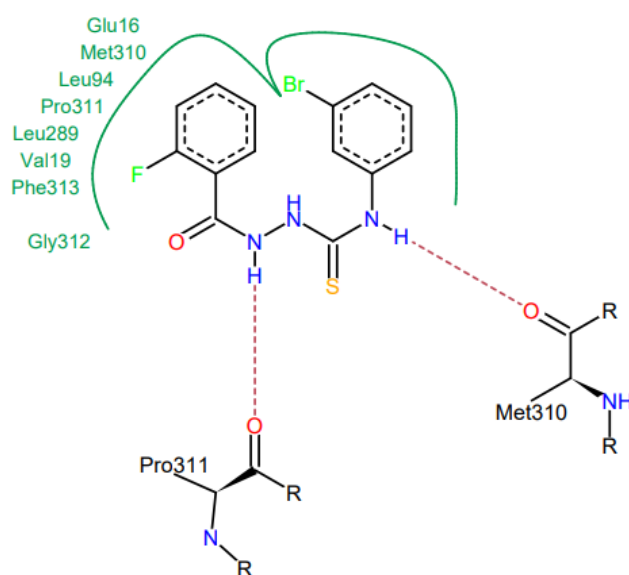

**11a**

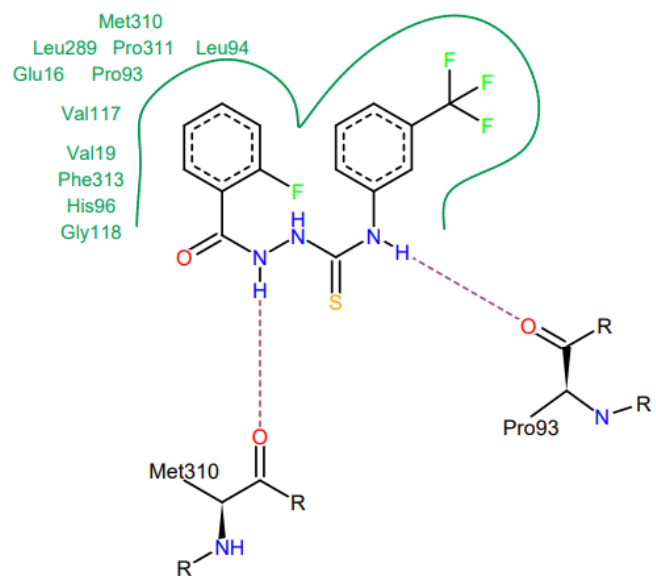

**15a**

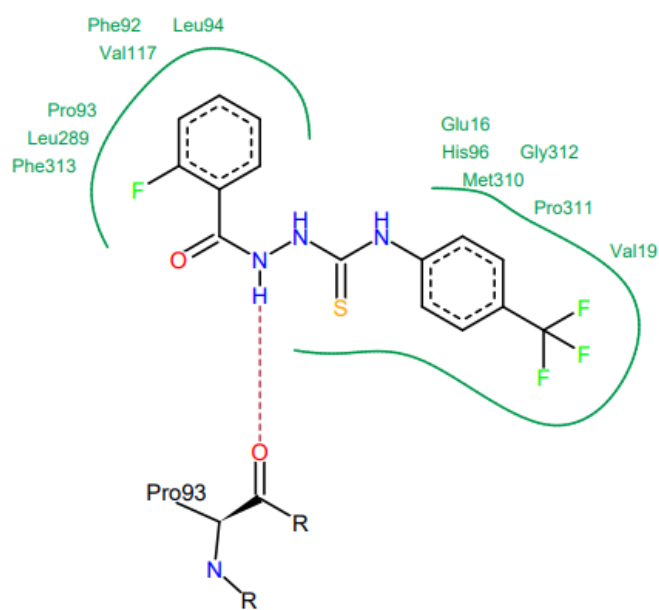

**16a**

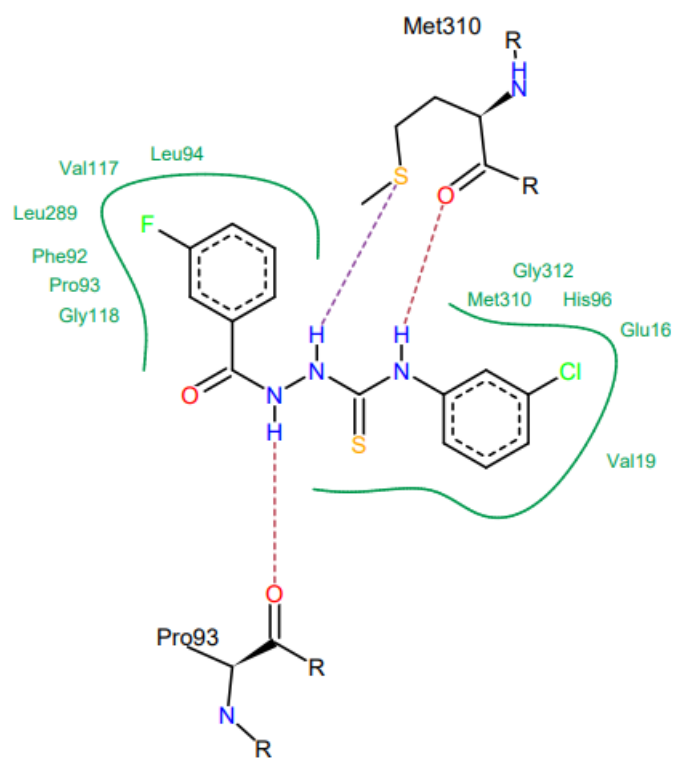

9b

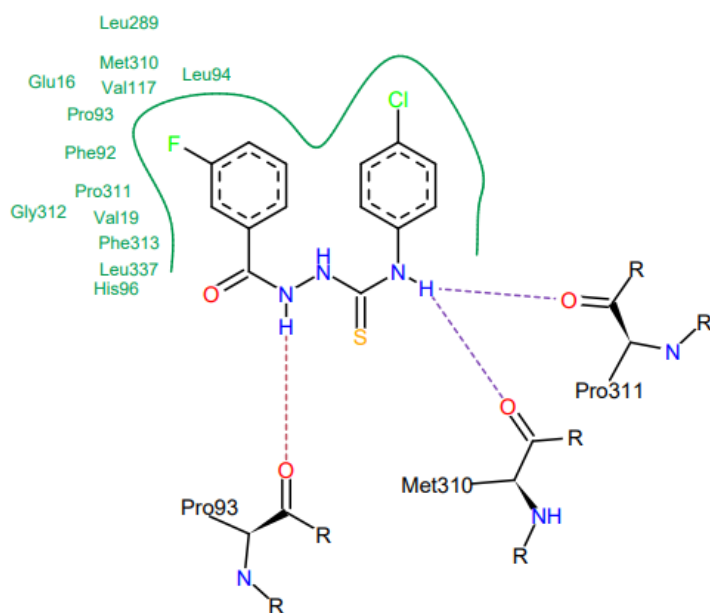

10b

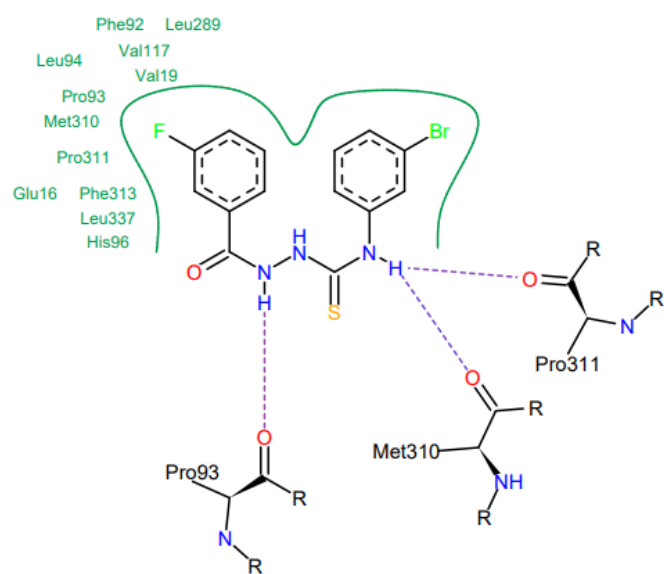

**11b**

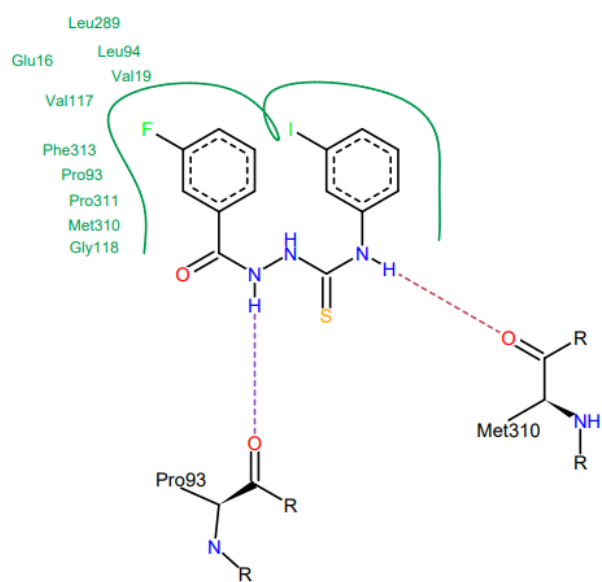

**13b**

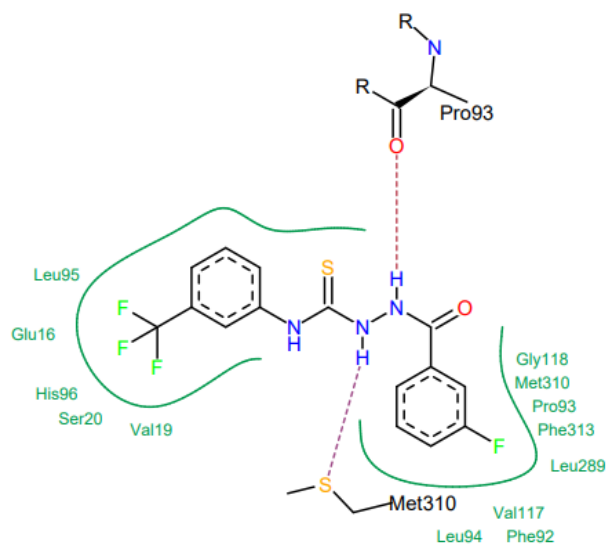

**15b**

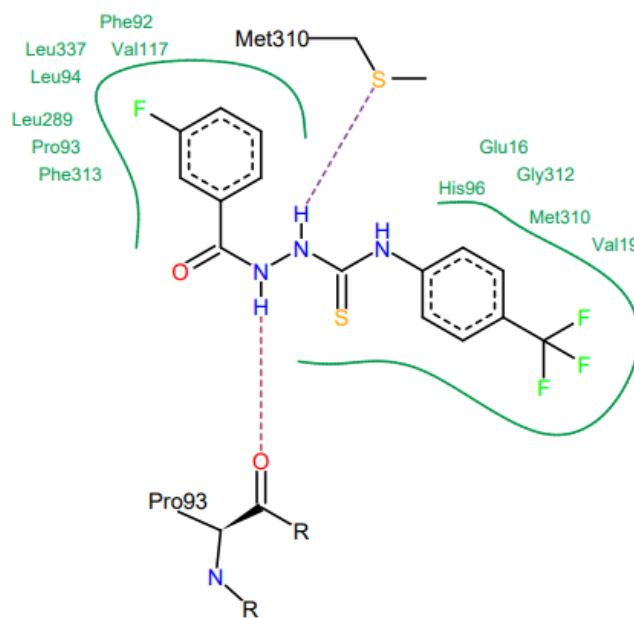

**16b**
